# Supplementary material for: Mechanisms underlying the response of mouse cortical networks to optogenetic manipulation
Source: eLife journal article supplement (doi:10.7554/elife.49967), 2020-01-17
Supplement: supp [file elife_poa_e49967_Figure_4_figure_supplement_1.pdf › elife_poa_e49967_Figure_4_figure_supplement_1.pdf]

$$\chi_{EI} = \frac{1}{J_{IE} \Delta} \left[ \begin{array}{c} \text{PC} \xrightarrow{J_{IE}} \text{PV} \\ \text{PV} \xrightarrow{J_{EI}} \text{PC} \end{array} \times \begin{array}{c} \text{SOM} \xrightarrow{J_{VS}} \text{VIP} \\ \text{VIP} \xrightarrow{J_{SV}} \text{SOM} \end{array} - \begin{array}{c} \text{PC} \xrightarrow{J_{IE}} \text{PV} \\ \text{PV} \xrightarrow{J_{VI}} \text{VIP} \\ \text{VIP} \xrightarrow{J_{SV}} \text{SOM} \\ \text{SOM} \xrightarrow{J_{ES}} \text{PC} \end{array} \right]$$

$$\chi_{II} = \frac{1}{\Delta} \left[ \begin{array}{c} \text{PC} \xrightarrow{J_{EE}} \text{PC} \\ \text{SOM} \xrightarrow{J_{VS}} \text{VIP} \\ \text{VIP} \xrightarrow{J_{SV}} \text{SOM} \end{array} \times \begin{array}{c} \text{PC} \xrightarrow{J_{ES}} \text{SOM} \\ \text{SOM} \xrightarrow{J_{VE}} \text{VIP} \\ \text{VIP} \xrightarrow{J_{SV}} \text{SOM} \end{array} \right]$$

$$\chi_{SI} = \frac{1}{J_{IS} \Delta} \left[ \begin{array}{c} \text{PC} \xrightarrow{J_{EE}} \text{PC} \\ \text{PV} \xrightarrow{J_{VI}} \text{VIP} \\ \text{VIP} \xrightarrow{J_{SV}} \text{SOM} \\ \text{SOM} \xrightarrow{J_{IS}} \text{PV} \end{array} \times \begin{array}{c} \text{PC} \xrightarrow{J_{EI}} \text{PV} \\ \text{PV} \xrightarrow{J_{IS}} \text{SOM} \\ \text{SOM} \xrightarrow{J_{SV}} \text{VIP} \\ \text{VIP} \xrightarrow{J_{VE}} \text{PC} \end{array} \right]$$
