# Supplementary figures and images for: Mechanisms underlying the response of mouse cortical networks to optogenetic manipulation
Source: eLife journal article supplement (doi:10.7554/elife.49967), 2020-01-17

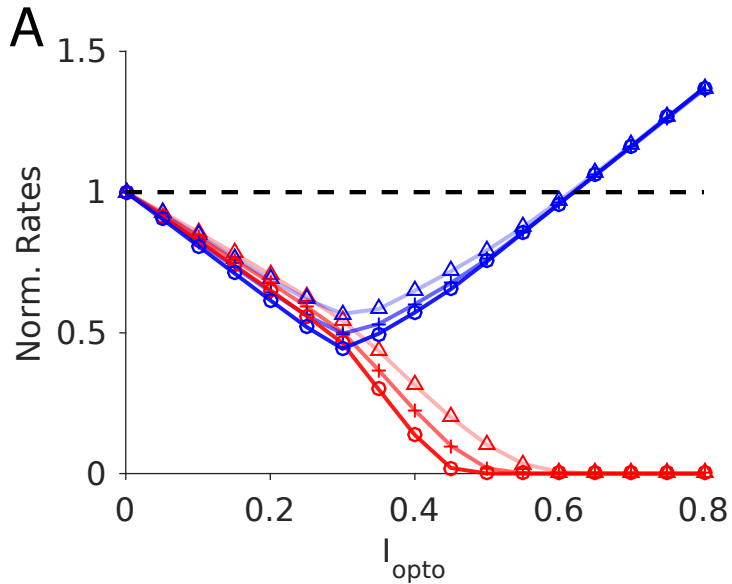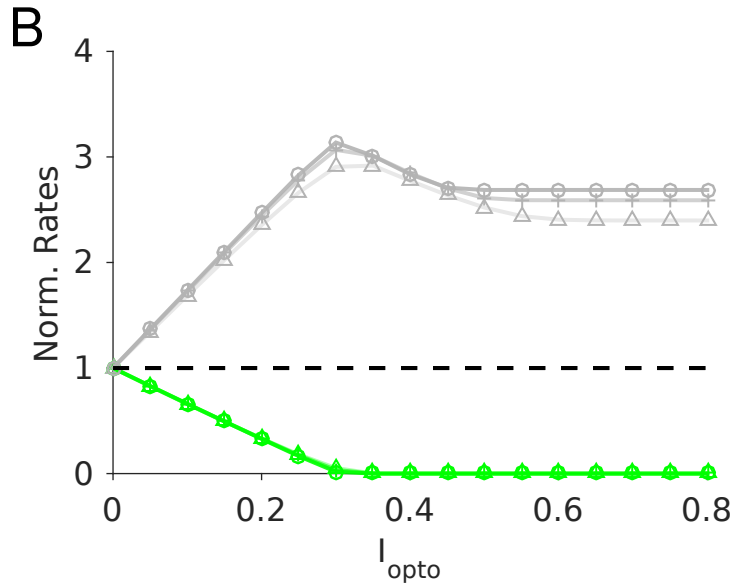

Supplement: supp [file elife_poa_e49967_Figure_10_figure_supplement_1.pdf › elife_poa_e49967_Figure_10_figure_supplement_1.pdf]

**A**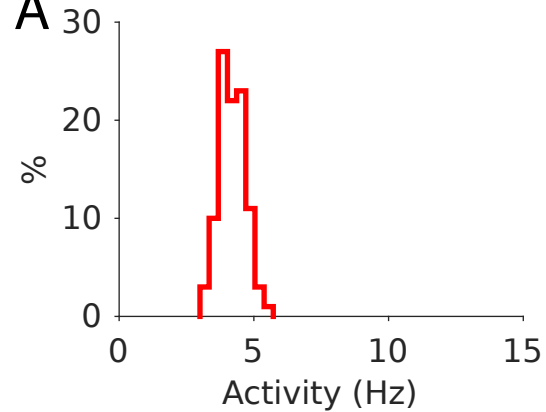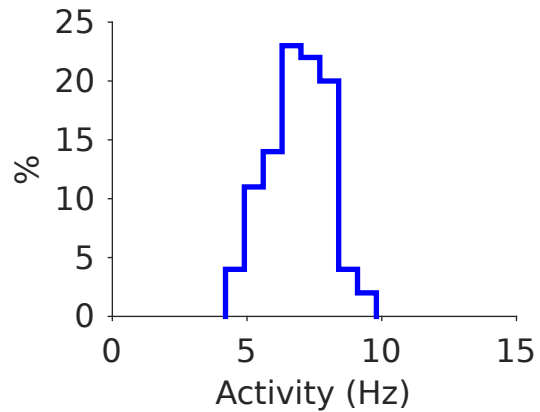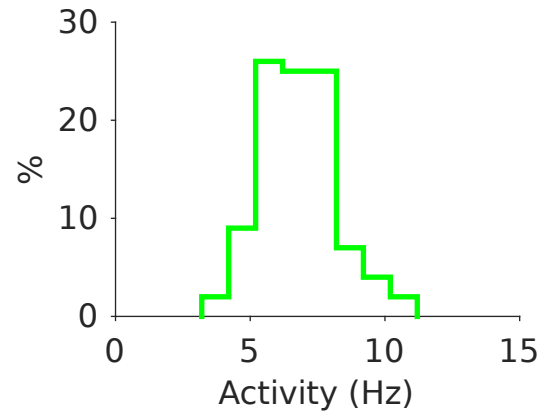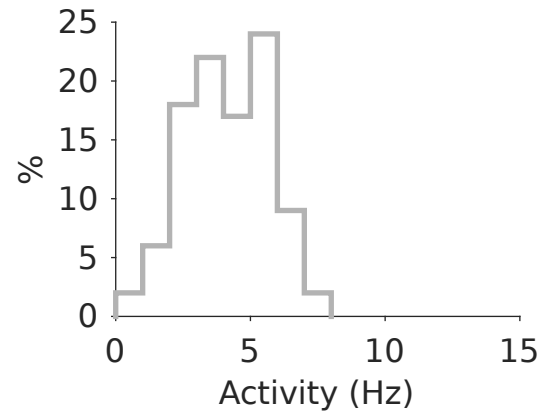**B**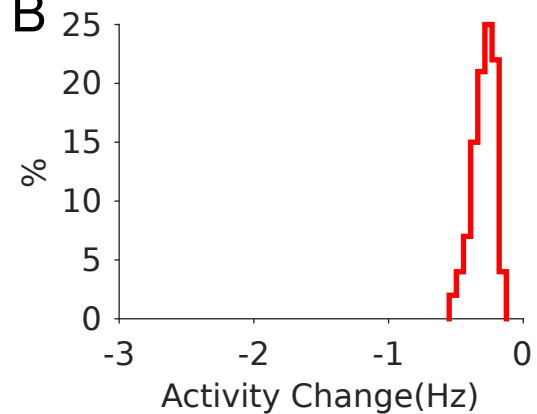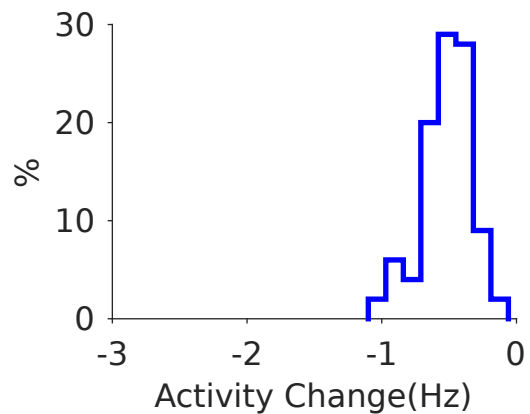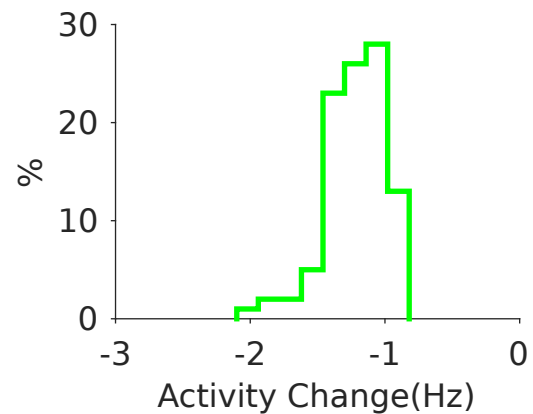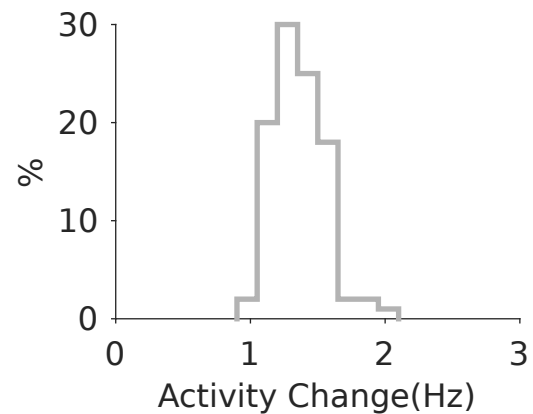

Supplement: supp [file elife_poa_e49967_Figure_10_figure_supplement_2.pdf › elife_poa_e49967_Figure_10_figure_supplement_2.pdf]

PC

PV

SOM

X

A

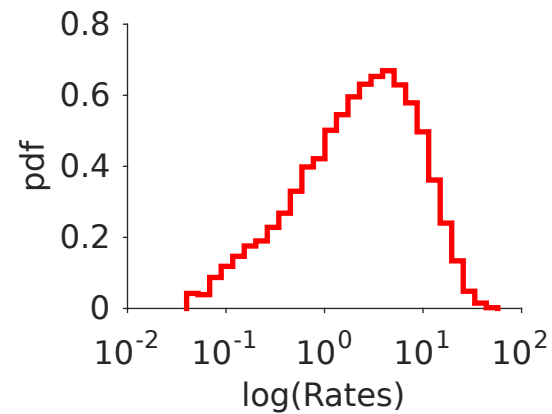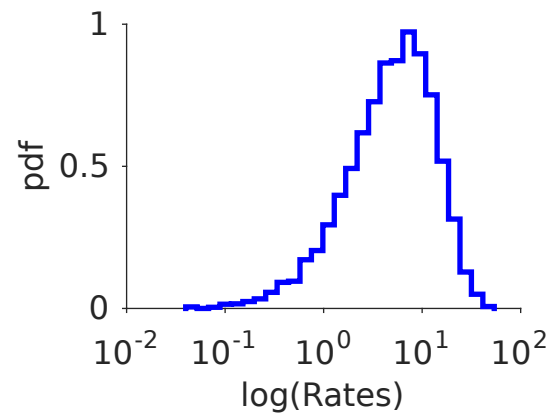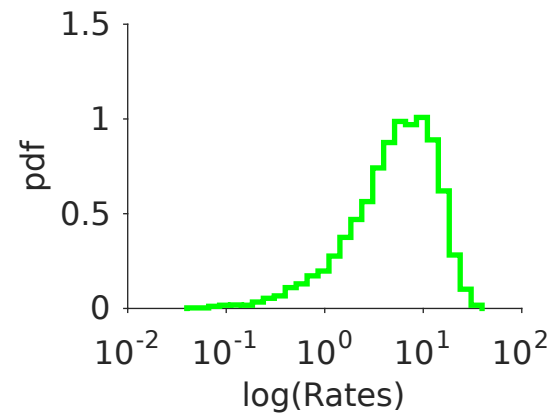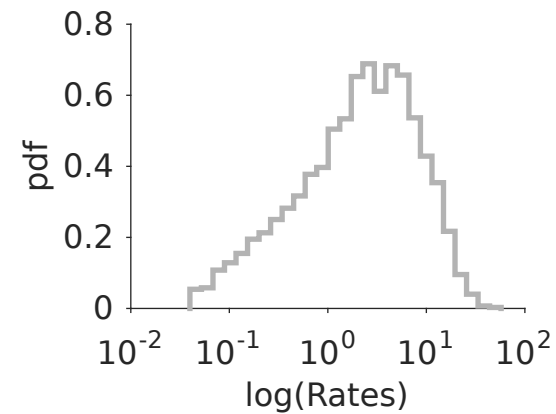

B

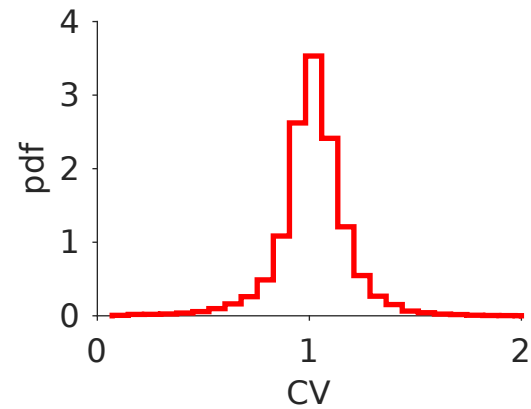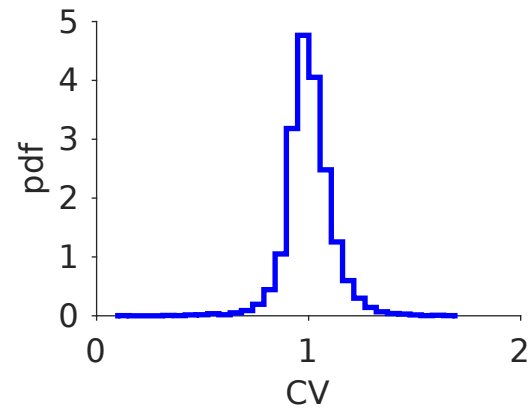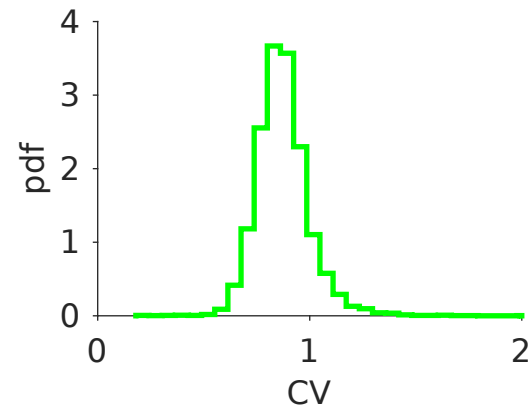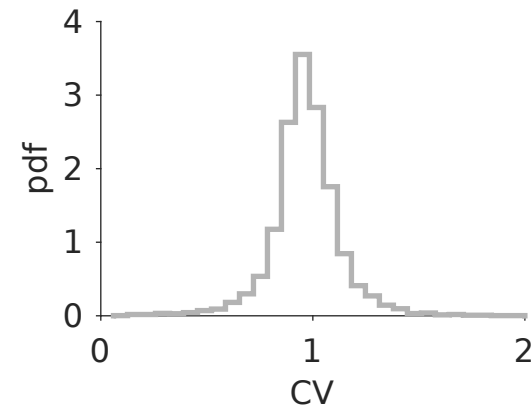

Supplement: supp [file elife_poa_e49967_Figure_10_figure_supplement_3.pdf › elife_poa_e49967_Figure_10_figure_supplement_3.pdf]

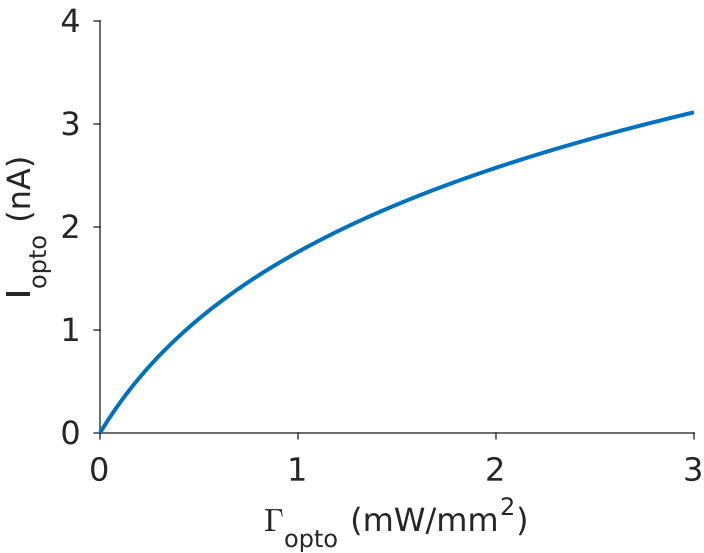

Supplement: supp [file elife_poa_e49967_Figure_3_figure_supplement_1.pdf › elife_poa_e49967_Figure_3_figure_supplement_1.pdf]

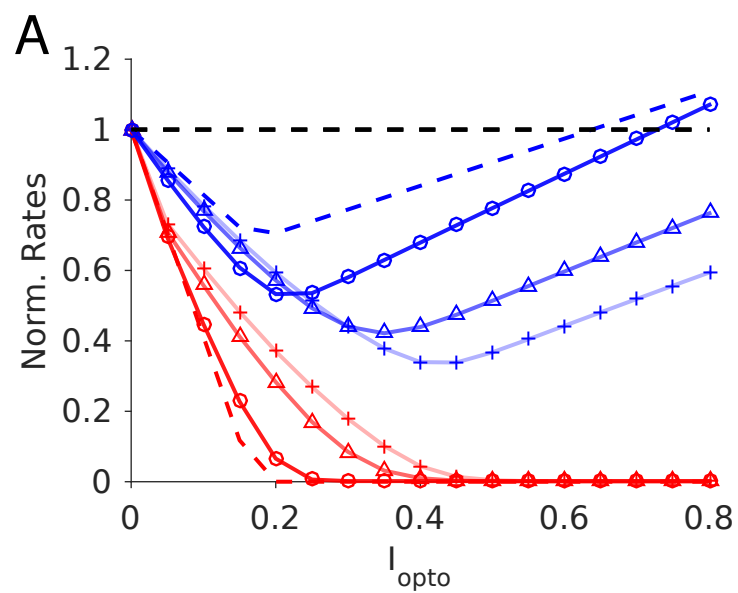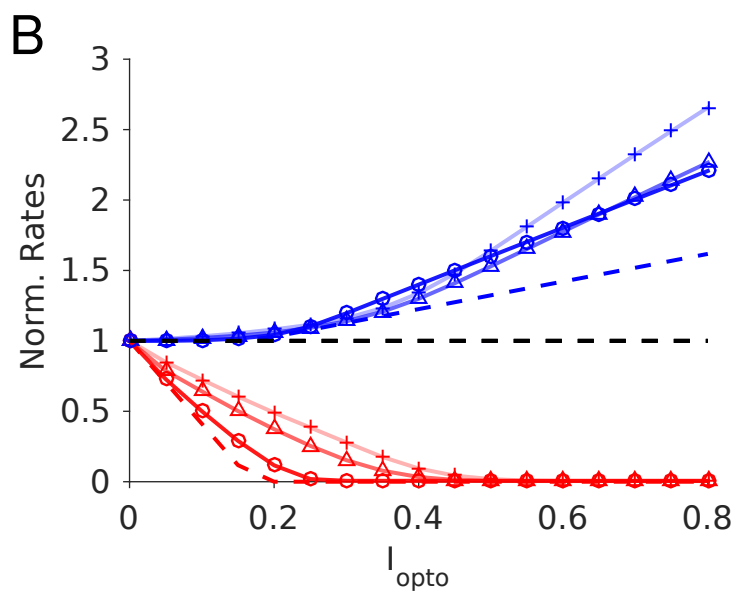

Supplement: supp [file elife_poa_e49967_Figure_3_figure_supplement_2.pdf › elife_poa_e49967_Figure_3_figure_supplement_2.pdf]

**A**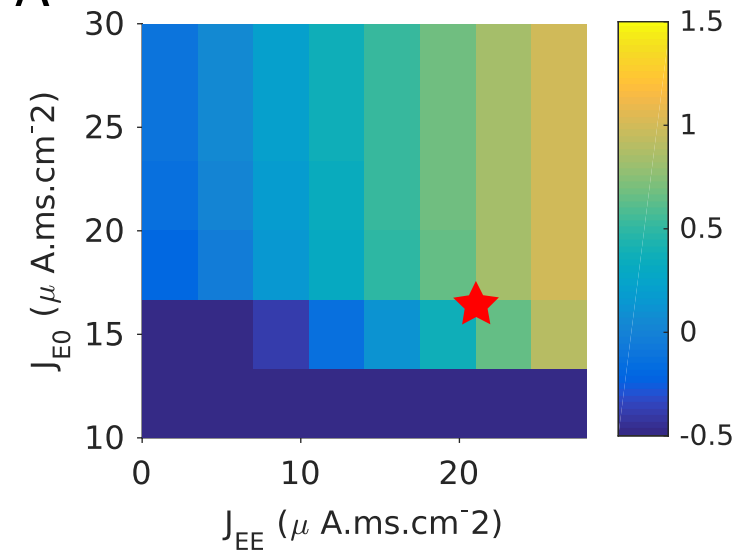**B**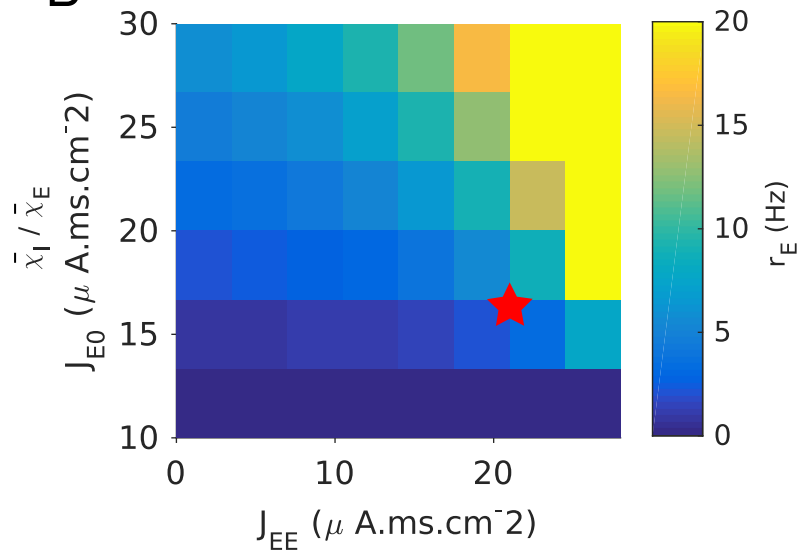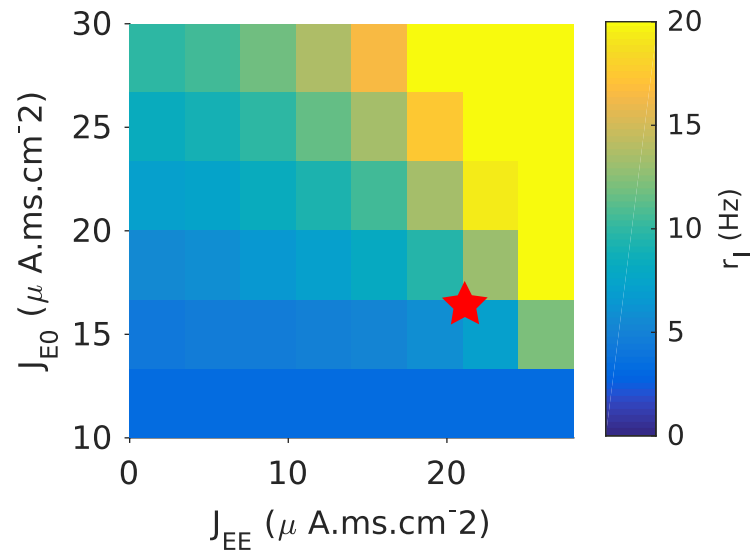

Supplement: supp [file elife_poa_e49967_Figure_3_figure_supplement_3.pdf › elife_poa_e49967_Figure_3_figure_supplement_3.pdf]

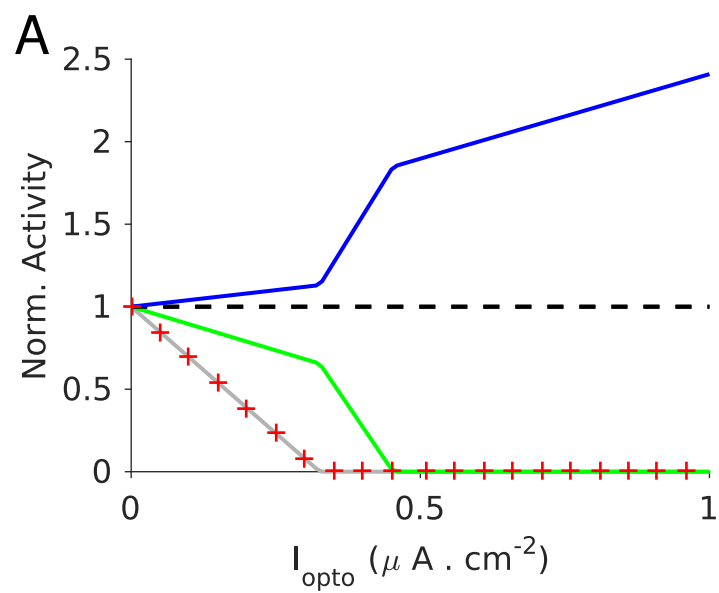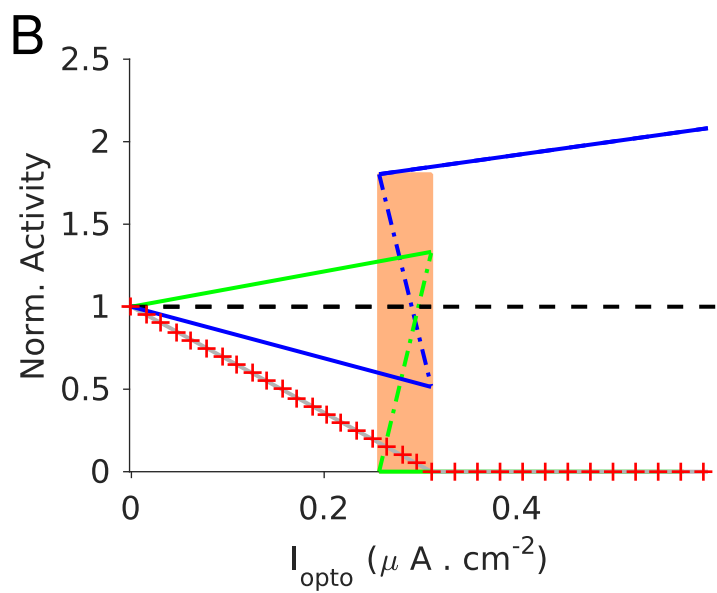

Supplement: supp [file elife_poa_e49967_Figure_4_figure_supplement_2.pdf › elife_poa_e49967_Figure_4_figure_supplement_2.pdf]

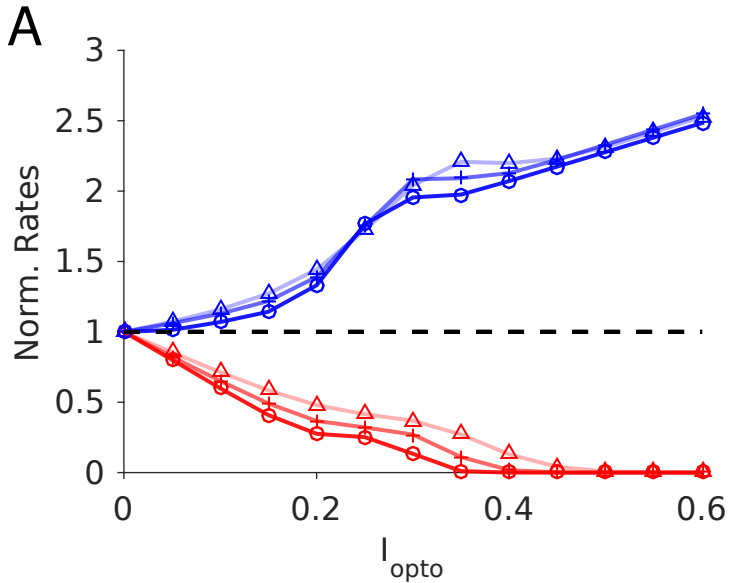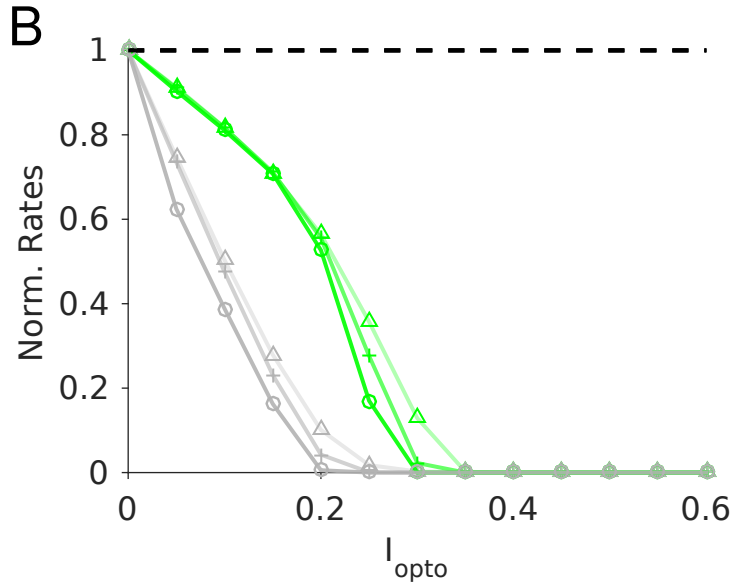

Supplement: supp [file elife_poa_e49967_Figure_5_figure_supplement_1.pdf › elife_poa_e49967_Figure_5_figure_supplement_1.pdf]

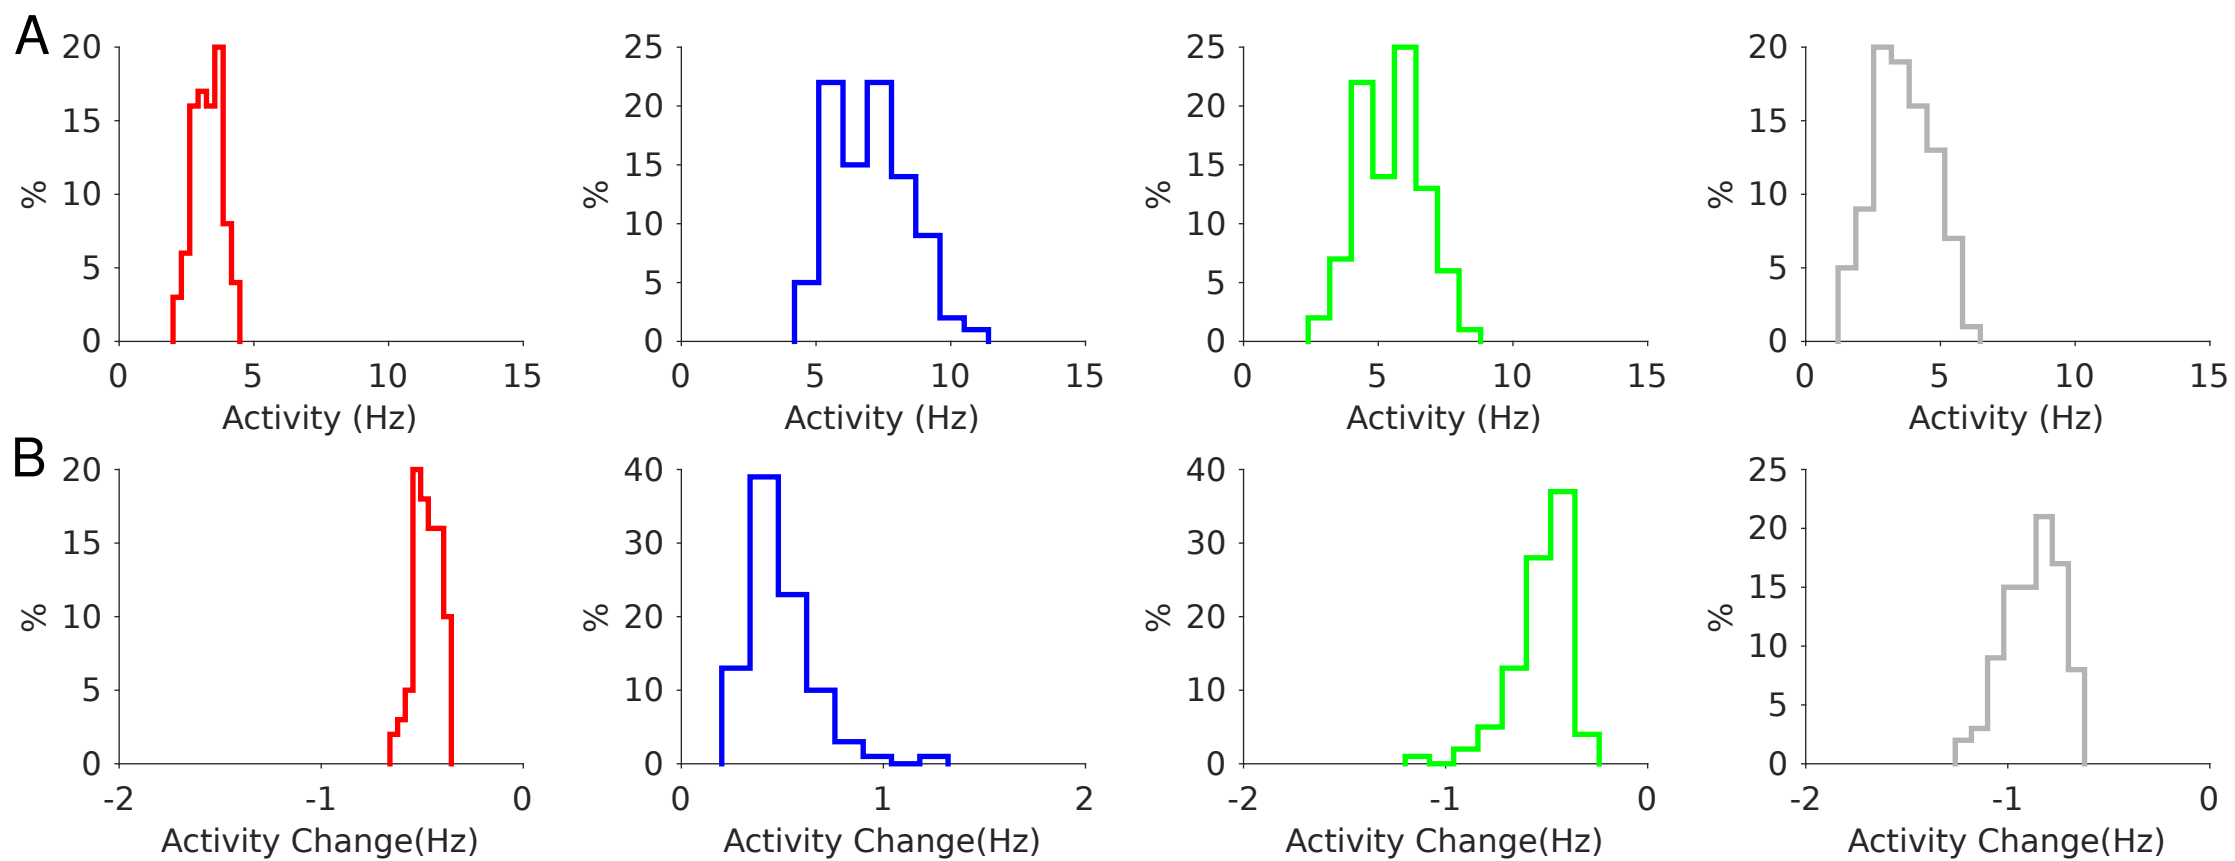

Supplement: supp [file elife_poa_e49967_Figure_5_figure_supplement_2.pdf › elife_poa_e49967_Figure_5_figure_supplement_2.pdf]

PC

PV

SOM

VIP

A

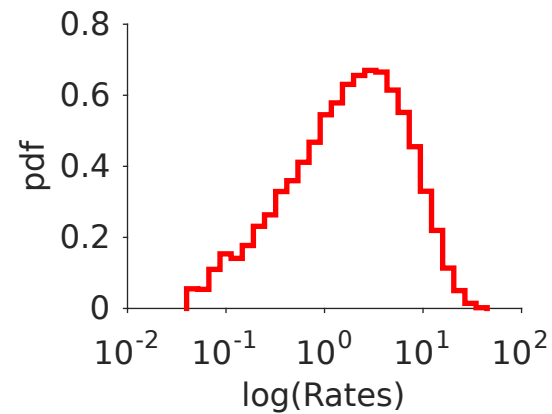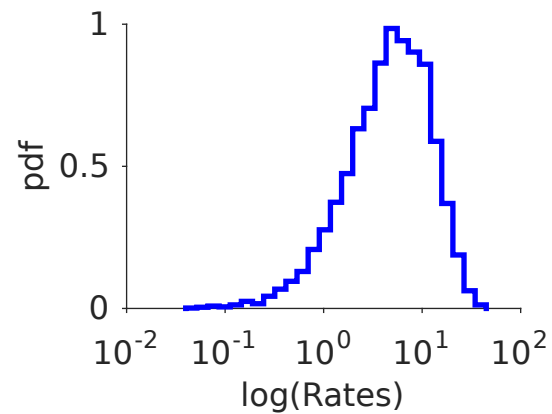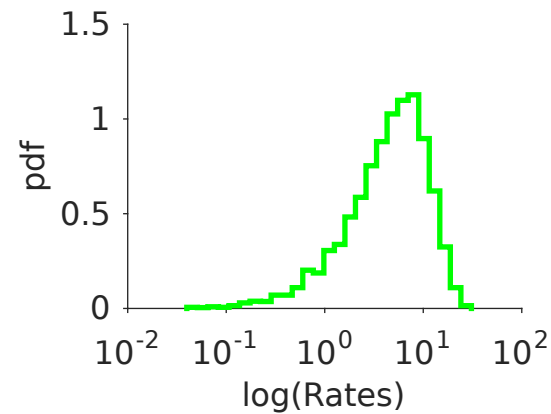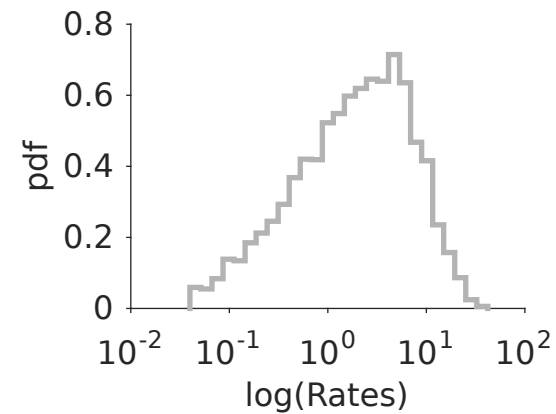

B

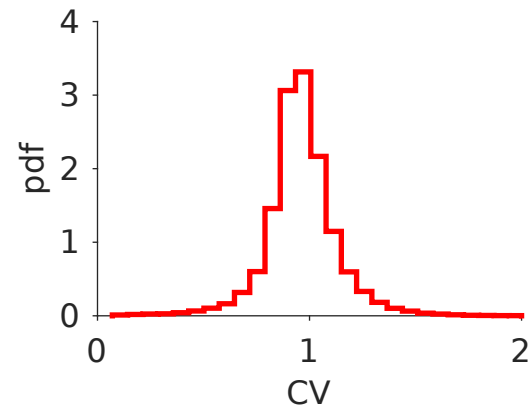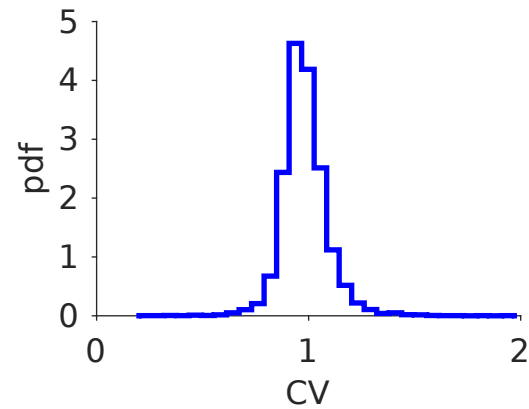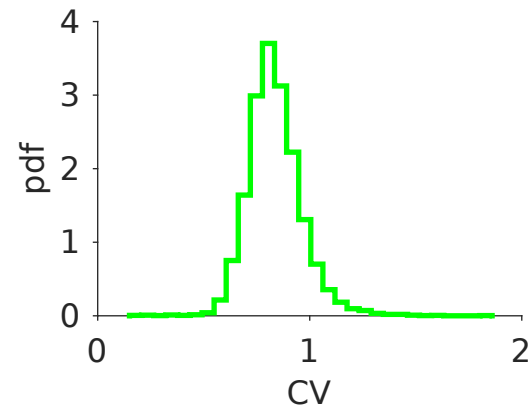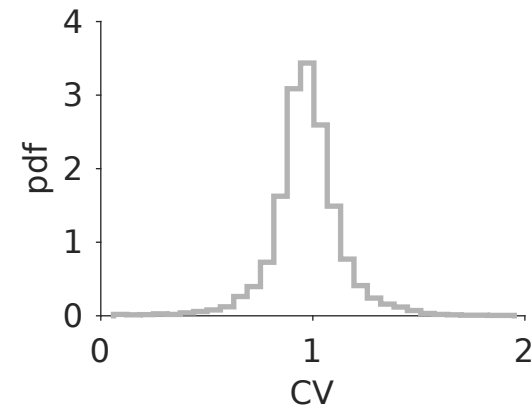

Supplement: supp [file elife_poa_e49967_Figure_5_figure_supplement_3.pdf › elife_poa_e49967_Figure_5_figure_supplement_3.pdf]

**A**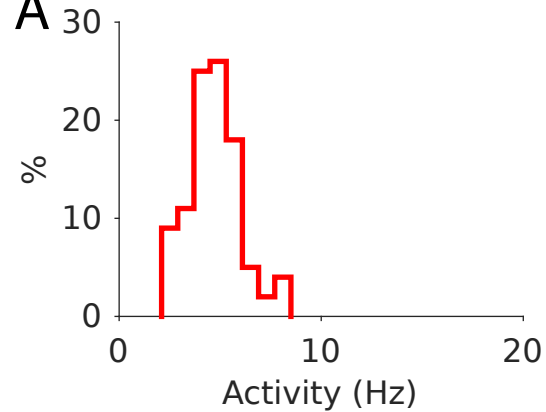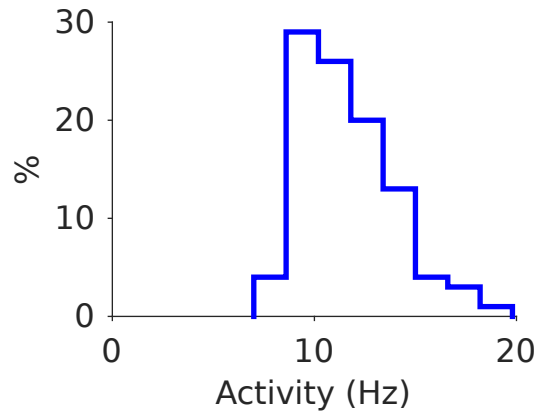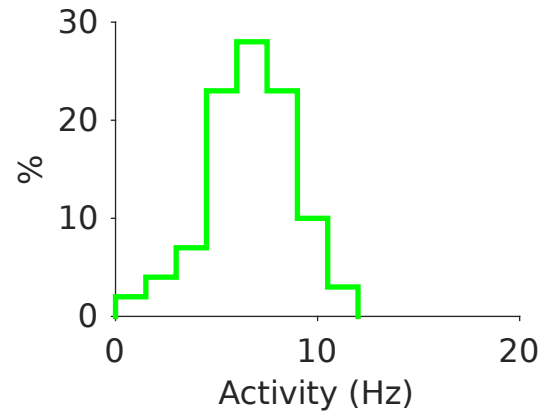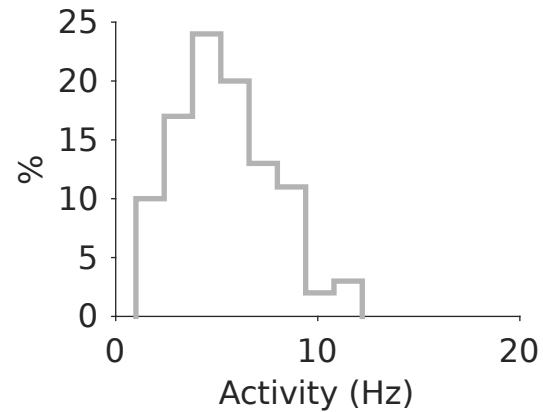**B**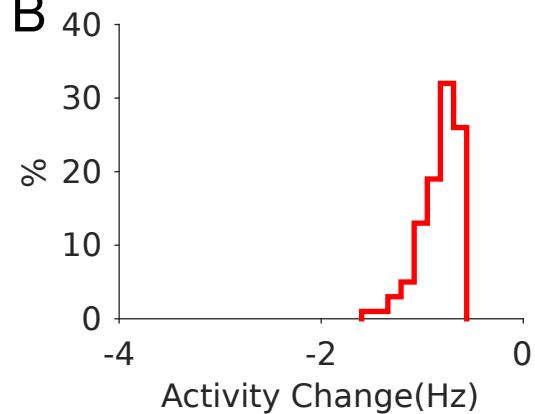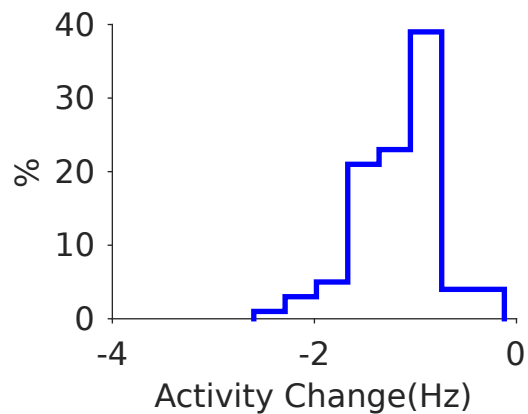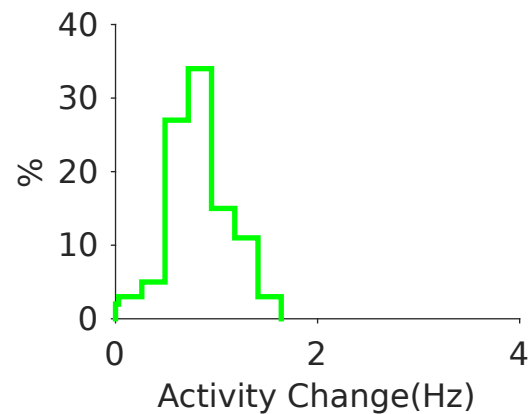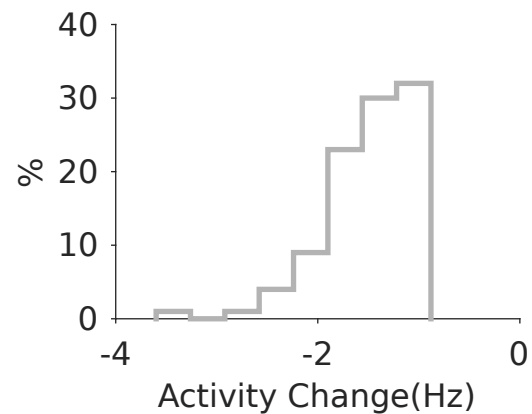

Supplement: supp [file elife_poa_e49967_Figure_7_figure_supplement_1.pdf › elife_poa_e49967_Figure_7_figure_supplement_1.pdf]

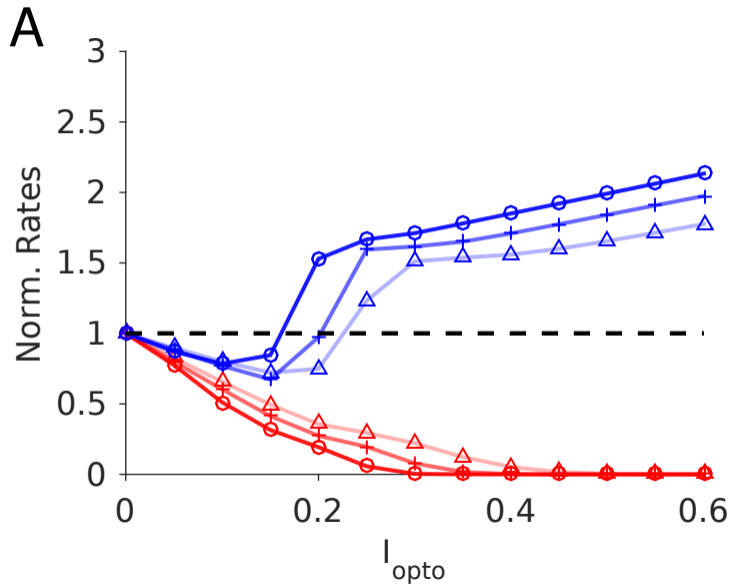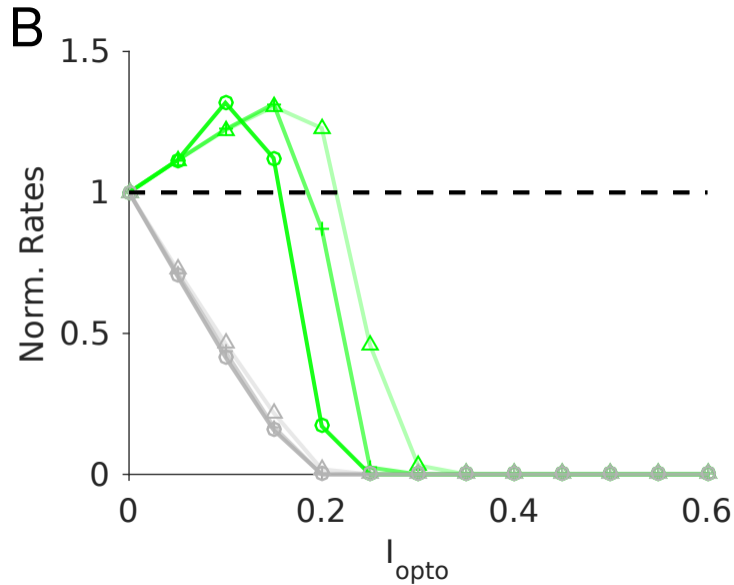

Supplement: supp [file elife_poa_e49967_Figure_7_figure_supplement_2.pdf › elife_poa_e49967_Figure_7_figure_supplement_2.pdf]

**A**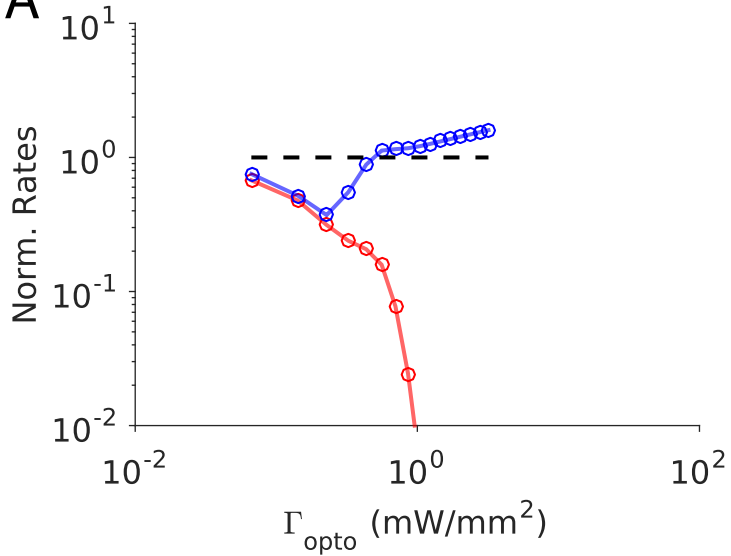**B**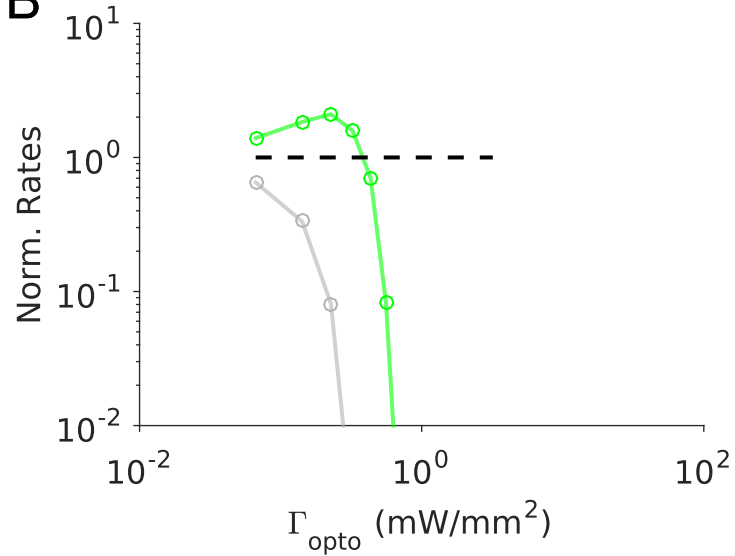

Supplement: supp [file elife_poa_e49967_Figure_7_figure_supplement_3.pdf › elife_poa_e49967_Figure_7_figure_supplement_3.pdf]

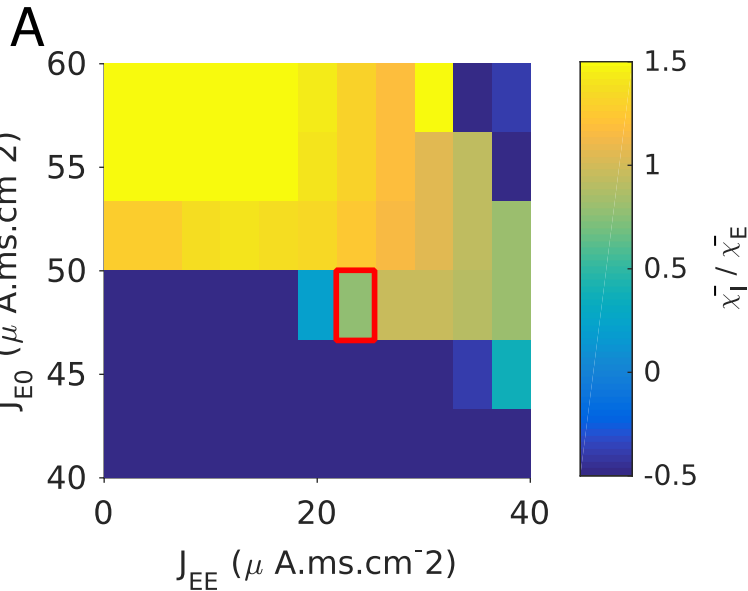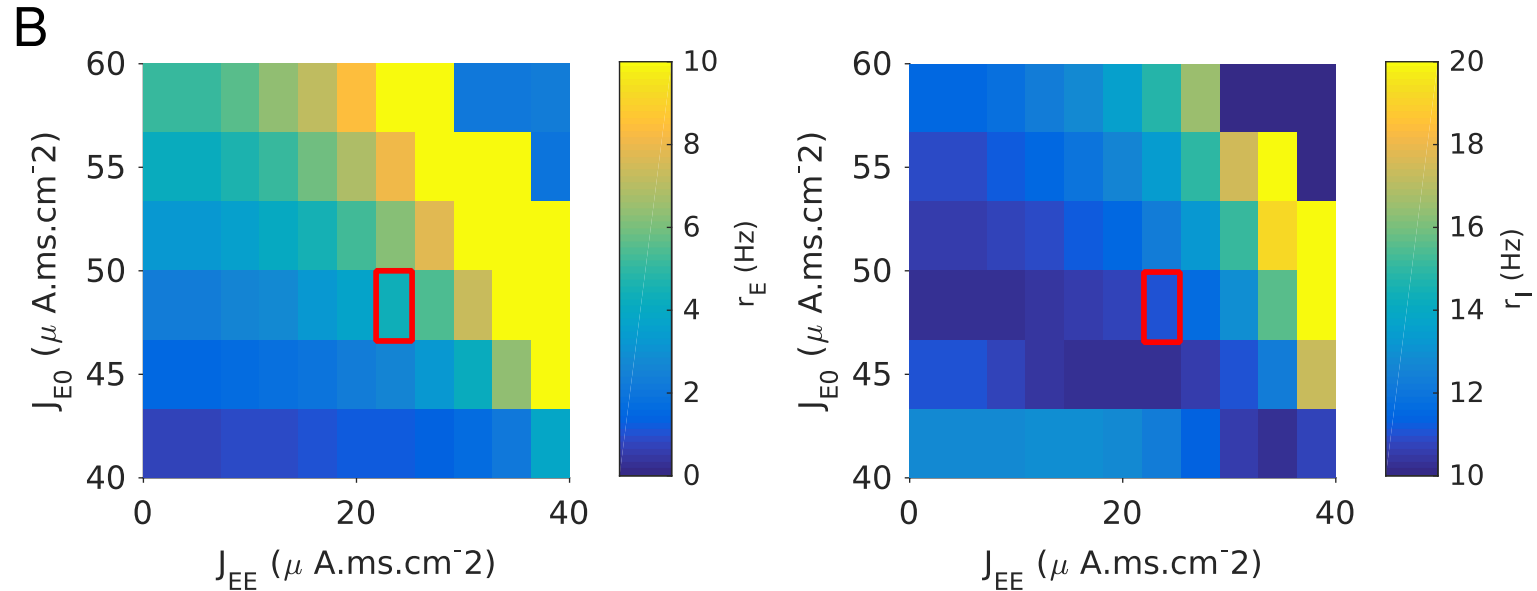

Supplement: supp [file elife_poa_e49967_Figure_7_figure_supplement_4.pdf › elife_poa_e49967_Figure_7_figure_supplement_4.pdf]

PC

PV

SOM

VIP

A

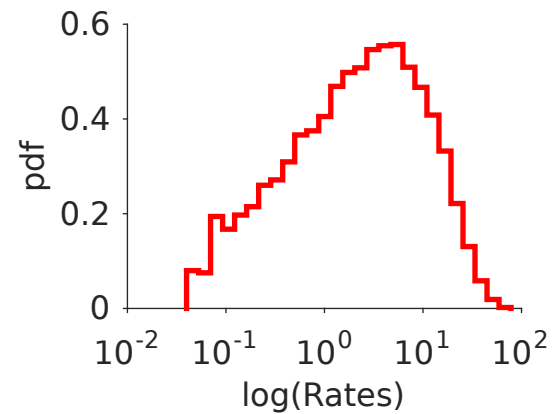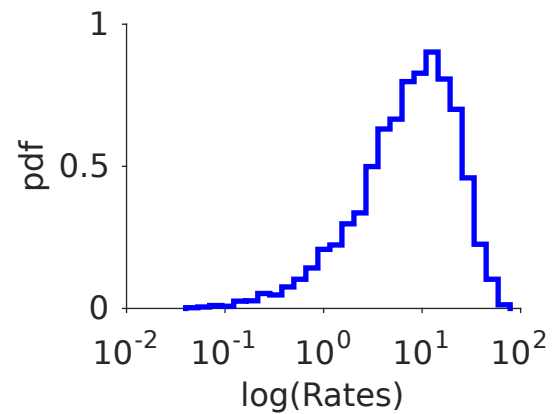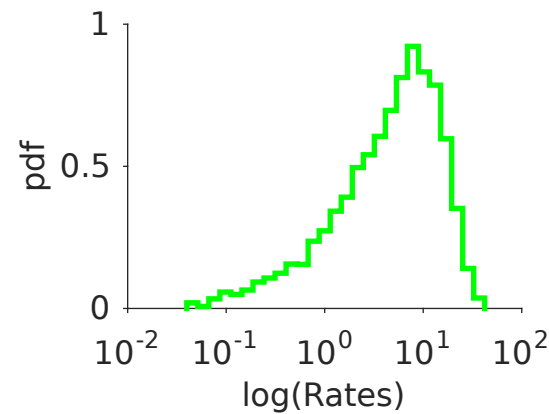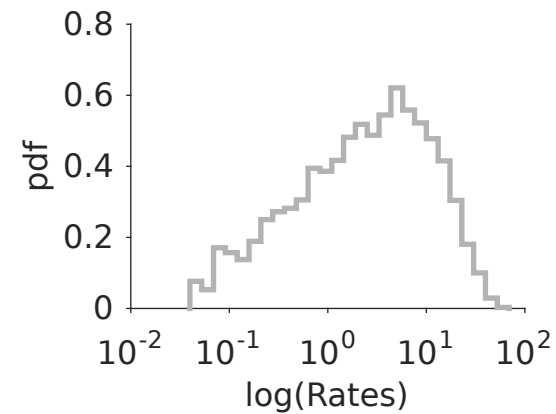

B

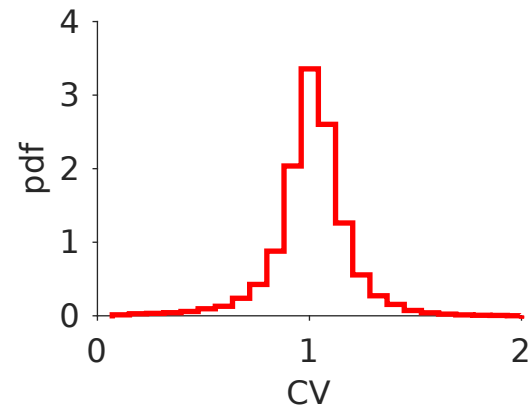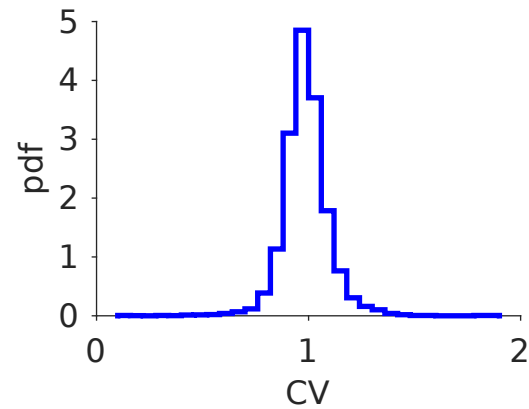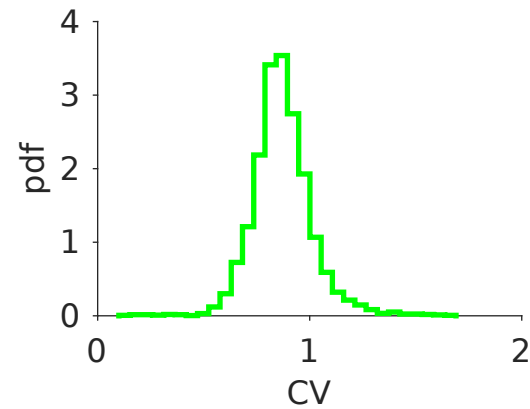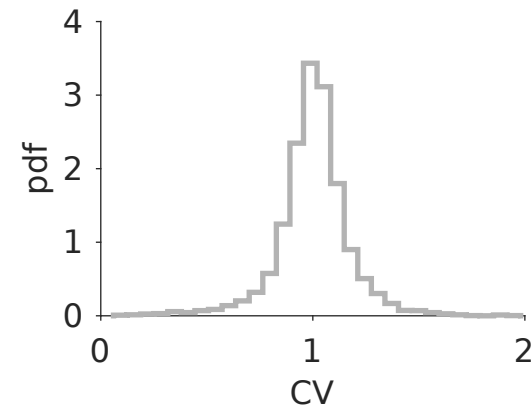

Supplement: supp [file elife_poa_e49967_Figure_7_figure_supplement_5.pdf › elife_poa_e49967_Figure_7_figure_supplement_5.pdf]
